# Supplementary material for: Evaluation of Smallpox Vaccination Coverage and Attitude towards Monkeypox Vaccination among Healthcare Workers in an Italian University Hospital
Source: MDPI journal article supplement (doi:10.3390/vaccines11121741), 2023-11-22
Supplement: s1 [file s1]

**Table S1.** Extract from the risk assessment (RA) for the different wards.

| Department            | Type of Exposure                                             | Risk Assessment           |
|-----------------------|--------------------------------------------------------------|---------------------------|
| Virology              | possible direct exposure to the virus                        | From low to high risk     |
| Emergency room        | assistance to infected cases (doctors and health assistants) | From low to moderate risk |
| Emergency medicine    | assistance to infected cases (doctors and health assistants) | From low to moderate risk |
| Infectious diseases   | assistance to infected cases (doctors and health assistants) | From low to moderate risk |
| Proctological surgery | assistance to infected cases (doctors and health assistants) | From low to moderate      |
| Dermatology           | assistance to infected cases (doctors and health assistants) | From very low to low risk |
| Otolaryngology        | assistance to infected cases (doctors and health assistants) | From very low to low risk |
| Urology               | assistance to infected cases (doctors and health assistants) | From very low to low risk |
| Andrology             | assistance to infected cases (doctors and health assistants) | From very low to low risk |
| Pediatric ED          | assistance to infected cases (doctors and health assistants) | From low to moderate risk |
| Pediatrics            | assistance to infected cases (doctors and health assistants) | From very low to low risk |
| Dentistry             | assistance to infected cases (doctors and health assistants) | From very low to low risk |

**Table S2.** Year of birth and department of HCWS who did not complete the self-declaration.

|                           | Born since 1979 | Born before 1979 | <i>p</i> |
|---------------------------|-----------------|------------------|----------|
| Department                |                 |                  |          |
| • Infectious diseases     | 2 (22.2%)       | 7 (77.8%)        | 0.012    |
| • Emergency medicine      | 69 (59.5%)      | 47 (40.5%)       |          |
| • Virology                | 0 (0%)          | 5 (100%)         |          |
| • Proctological surgery   | 2 (50%)         | 2 (50%)          |          |
| Infectious diseases       | 2 (22.2%)       | 7 (77.8%)        | 0.044    |
| Not infectious diseases   | 71 (56.8%)      | 54 (43.2%)       |          |
| Emergency medicine        | 69 (59.5%)      | 47 (40.5%)       | 0.003    |
| Not emergency medicine    | 4 (22.2%)       | 14 (77.8%)       |          |
| Virology                  | 0 (0%)          | 5 (100%)         | 0.013    |
| Not virology              | 73 (56.6%)      | 56 (43.4%)       |          |
| Proctological surgery     | 2 (50%)         | 2 (50%)          | 0.855    |
| Not proctological surgery | 71 (54.6%)      | 59 (45.4%)       |          |

The undersigned \_\_\_\_\_ sex \_\_\_\_\_  
born in \_\_\_\_\_ (\_\_\_\_\_) the \_\_\_\_/\_\_\_\_/\_\_\_\_  
Job duty \_\_\_\_\_  
department \_\_\_\_\_ Phone number \_\_\_\_\_  
e-mail \_\_\_\_\_

*Aware that anyone who makes false statements is punished pursuant to the Penal Code and the special laws on the subject, pursuant to and by effect of art. 46 Presidential Decree No. 445/2000*

**DECLARES**

- to have been vaccinated for SMALLPOX:

YES ☐ NO ☐

|                                    |                              |                                                                       |
|------------------------------------|------------------------------|-----------------------------------------------------------------------|
|                                    | If positive,                 |                                                                       |
| - NUMBER OF DOSES:                 | 1 <input type="checkbox"/>   | 2 <input type="checkbox"/> I do not remember <input type="checkbox"/> |
| - possession of any certification: | YES <input type="checkbox"/> | NO <input type="checkbox"/>                                           |

**FINALLY DECLARES**

In the case of the vaccination offer, do you intend to undergo vaccination?

YES ☐ NO ☐

Pisa, \_\_\_\_\_

The declarer

\_\_\_\_\_

**Figure S1.** Self-declaration translated into English.
